# Supplementary material for: Qualitative Analysis and Componential Differences of Chemical Constituents in Taxilli Herba from Different Hosts by UFLC-Triple TOF-MS/MS
Source: MDPI journal article supplement (doi:10.3390/molecules26216373), 2021-10-21
Supplement: s1 [file s1]

Table S1. Identification of 85 constituents in Taxilli Herba from 7 hosts by UFLC-Triple TOF-MS/MS.

| No. | $t_R$<br>/min | Molecular<br>formula                                          | $MS^1(m/z)$                | $MS^2(m/z)$                                                                                                                                                                                                    | Error<br>/ppm | Compound                                                      | Hosts |   |   |   |   |   |   | References |
|-----|---------------|---------------------------------------------------------------|----------------------------|----------------------------------------------------------------------------------------------------------------------------------------------------------------------------------------------------------------|---------------|---------------------------------------------------------------|-------|---|---|---|---|---|---|------------|
|     |               |                                                               |                            |                                                                                                                                                                                                                |               |                                                               | a     | b | c | d | e | f | g |            |
| 1   | 2.24          | C <sub>6</sub> H <sub>12</sub> O <sub>6</sub>                 | 179.0561[M-H] <sup>-</sup> | 161.0457[M-H-H <sub>2</sub> O] <sup>-</sup> , 117.0207, 89.0248, 71.0158                                                                                                                                       | 0.05          | Glucose                                                       | +     | + | + | + | - | + | + | [19]       |
| 2   | 2.27          | C <sub>5</sub> H <sub>10</sub> N <sub>2</sub> O <sub>3</sub>  | 145.0633[M-H] <sup>-</sup> | 128.0539[M-H-NH <sub>3</sub> ] <sup>-</sup> , 127.0514[M-H-H <sub>2</sub> O] <sup>-</sup> ,                                                                                                                    | 0.70          | Glutamine                                                     | +     | + | + | + | + | + | + | [20]       |
| 3   | 2.54          | C <sub>11</sub> H <sub>20</sub> O <sub>10</sub>               | 311.0991[M-H] <sup>-</sup> | 233.0654[M-H-C <sub>2</sub> H <sub>3</sub> O <sub>2</sub> -CHOH] <sup>-</sup> ,                                                                                                                                | 1.93          | Primeverose                                                   | +     | - | + | + | + | + | + | [21]       |
| 4*  | 2.59          | C <sub>10</sub> H <sub>13</sub> N <sub>5</sub> O <sub>5</sub> | 282.0830[M-H] <sup>-</sup> | 150.0426[M-H-Rib] <sup>-</sup> , 133.0153[M-H-Rib-H <sub>2</sub> O] <sup>-</sup>                                                                                                                               | 4.90          | Guanosine                                                     | +     | + | + | + | + | + | + | [22]       |
| 5   | 2.63          | C <sub>7</sub> H <sub>12</sub> O <sub>6</sub>                 | 191.0057[M-H] <sup>-</sup> | 173.0454[M-H-H <sub>2</sub> O] <sup>-</sup> , 127.0397[M-H-H <sub>2</sub> O-HCOOH] <sup>-</sup> ,                                                                                                              | 0.05          | Quinic acid                                                   | +     | + | + | + | + | + | + | [23]       |
| 6   | 2.86          | C <sub>7</sub> H <sub>10</sub> O <sub>5</sub>                 | 173.0472[M-H] <sup>-</sup> | 155.0407[M-H <sub>2</sub> O] <sup>-</sup> , 137.0246[M-H-2H <sub>2</sub> O] <sup>-</sup> ,                                                                                                                     | 1.10          | Shikimic acid                                                 | +     | - | + | + | + | + | + | [24]       |
| 7   | 3.12          | C <sub>4</sub> H <sub>6</sub> O <sub>5</sub>                  | 133.0146[M-H] <sup>-</sup> | 115.0041[M-H-H <sub>2</sub> O] <sup>-</sup> , 71.0160[M-H-H <sub>2</sub> O-CO <sub>2</sub> ] <sup>-</sup>                                                                                                      | 2.60          | Malic acid                                                    | +     | - | + | - | + | - | + | [25]       |
| 8   | 4.96          | C <sub>6</sub> H <sub>8</sub> O <sub>7</sub>                  | 191.0206[M-H] <sup>-</sup> | 173.0101[M-H-H <sub>2</sub> O] <sup>-</sup> , 154.9982[M-H-2H <sub>2</sub> O] <sup>-</sup> ,                                                                                                                   | 0.00          | Citric acid                                                   | +     | + | + | + | + | + | + | [26]       |
| 9   | 5.97          | C <sub>16</sub> H <sub>22</sub> O <sub>11</sub>               | 389.1082[M-H] <sup>-</sup> | 227.0543[M-H-Glc] <sup>-</sup> , 165.0544[M-H-Glc-COOH] <sup>-</sup>                                                                                                                                           | 0.90          | Monotropein                                                   | -     | + | + | - | + | - | + | [67]       |
| 10* | 7.93          | C <sub>7</sub> H <sub>6</sub> O <sub>5</sub>                  | 169.0138[M-H] <sup>-</sup> | 125.0240[M-H-CO <sub>2</sub> ] <sup>-</sup> , 107.0141[M-H-CO <sub>2</sub> -H <sub>2</sub> O] <sup>-</sup> ,<br>97.0341[M-H-CO <sub>2</sub> -CO] <sup>-</sup> , 69.0374[M-H-CO <sub>2</sub> -2CO] <sup>-</sup> | 2.60          | Gallic acid                                                   | +     | + | + | + | + | + | + | [27,28]    |
| 11  | 8.00          | C <sub>19</sub> H <sub>16</sub> O <sub>4</sub>                | 307.1029[M-H] <sup>-</sup> | 145.0508, 127.0397                                                                                                                                                                                             | 2.60          | Bisdemethoxycurcumin                                          | +     | + | + | + | + | + | + | [29]       |
| 12  | 8.86          | C <sub>13</sub> H <sub>16</sub> O <sub>10</sub>               | 331.0673[M-H] <sup>-</sup> | 179.0137[M-H-G] <sup>-</sup> , 169.0253, 161.024[M-H-G-H <sub>2</sub> O] <sup>-</sup>                                                                                                                          | 1.80          | Glucogallin                                                   | +     | + | + | + | + | + | + | [28]       |
| 13  | 9.03          | C <sub>13</sub> H <sub>18</sub> O <sub>8</sub>                | 301.0928[M-H] <sup>-</sup> | 139.0324[M-H-Glc] <sup>-</sup> , 123.0089[M-H-Glc-O] <sup>-</sup>                                                                                                                                              | 1.66          | Tachioside                                                    | +     | + | + | + | + | + | + | [26]       |
| 14  | 9.34          | C <sub>11</sub> H <sub>20</sub> O <sub>9</sub>                | 295.1045[M-H] <sup>-</sup> | 131.0934[M-H-Glc] <sup>-</sup> , 113.0252[M-H-Glc-H <sub>2</sub> O] <sup>-</sup> ,<br>85.0306, 71.016, 59.0162                                                                                                 | 0.30          | (1S)-2-(Acetyloxy)-1-(hydroxymethyl)ethyl-β-D-glucopyranoside | +     | + | + | + | + | + | + | [30]       |
| 15  | 9.39          | C <sub>20</sub> H <sub>20</sub> O <sub>11</sub>               | 435.1129[M-H] <sup>-</sup> | 271.0448[M-H-Glc] <sup>-</sup> , 313.0354, 151.0037, 125.0245                                                                                                                                                  | 2.52          | Homomangiferin                                                | +     | + | - | - | + | - | + | [31]       |
| 16  | 9.43          | C <sub>24</sub> H <sub>20</sub> O <sub>8</sub>                | 435.1124[M-H] <sup>-</sup> | 313.0509, 151.0025, 123.0085                                                                                                                                                                                   | 0.23          | Isochinomin                                                   | +     | + | - | - | - | + | + | [32]       |
| 17  | 9.55          | C <sub>26</sub> H <sub>22</sub> O <sub>10</sub>               | 493.1183[M-H] <sup>-</sup> | 331.0654[M-H-Gal] <sup>-</sup>                                                                                                                                                                                 | 1.42          | Fluorescein-β-D-galactopyranoside                             | +     | + | - | + | - | + | + | [29]       |
| 18  | 10.16         | C <sub>23</sub> H <sub>18</sub> O <sub>7</sub>                | 405.1031[M-H] <sup>-</sup> | 169.0134, 71.0154                                                                                                                                                                                              | 4.93          | Toddacoumaquinone                                             | +     | + | - | - | + | + | - | [32]       |
| 19  | 10.31         | C <sub>13</sub> H <sub>16</sub> O <sub>10</sub>               | 331.1061[M-H] <sup>-</sup> | 169.0134[M-H-Glc] <sup>-</sup> , 125.0240[M-H-Glc-CO <sub>2</sub> ] <sup>-</sup>                                                                                                                               | 0.60          | Gallic acid 3-O-β-D-glucopyranoside                           | +     | + | + | + | + | + | + | [33–35]    |
| 20  | 10.77         | C <sub>22</sub> H <sub>16</sub> O <sub>5</sub>                | 375.0927[M-H] <sup>-</sup> | 285.0437[M-H-Benzyl group] <sup>-</sup> , 151.0030 <sup>[1,3A]</sup>                                                                                                                                           | 1.06          | 7-O-Benzyl Luteolin                                           | +     | - | - | - | - | - | - | [27]       |
| 21  | 11.12         | C <sub>24</sub> H <sub>20</sub> O <sub>7</sub>                | 419.1177[M-H] <sup>-</sup> | 271.0421, 151.0033                                                                                                                                                                                             | 3.50          | Artonol B                                                     | +     | - | - | - | + | - | - | [36]       |
| 22  | 11.13         | C <sub>25</sub> H <sub>20</sub> O <sub>9</sub>                | 463.0869[M-H] <sup>-</sup> | 435.0761[M-H-CO] <sup>-</sup> , 273.0364[M-H-C <sub>10</sub> H <sub>11</sub> O <sub>3</sub> ] <sup>-</sup> ,                                                                                                   | 0.00          | Hydrocarpin                                                   | +     | - | - | + | - | - | - | [37,38]    |
| 23  | 11.30         | C <sub>26</sub> H <sub>30</sub> O <sub>14</sub>               | 565.1547[M-H] <sup>-</sup> | 403.0473[M-H-Glc] <sup>-</sup> , 241.0241[M-H-2Glc] <sup>-</sup>                                                                                                                                               | 2.80          | Mulberroside F                                                | +     | + | + | + | + | + | + | [39]       |
| 24* | 11.38         | C <sub>7</sub> H <sub>6</sub> O <sub>4</sub>                  | 153.0194[M-H] <sup>-</sup> | 109.0303[M-H-CO <sub>2</sub> ] <sup>-</sup> , 101.0314[M-H-CO <sub>2</sub> -CO] <sup>-</sup> ,                                                                                                                 | 6.90          | Protocatechuic acid                                           | +     | + | + | + | + | + | + | [27]       |

|     |       |                                                 |                            |                                                                                                                                                                                                                                                                                                                                                                                                                                                                                           |       |                                                   |   |   |   |   |   |   |   |         |
|-----|-------|-------------------------------------------------|----------------------------|-------------------------------------------------------------------------------------------------------------------------------------------------------------------------------------------------------------------------------------------------------------------------------------------------------------------------------------------------------------------------------------------------------------------------------------------------------------------------------------------|-------|---------------------------------------------------|---|---|---|---|---|---|---|---------|
| 25  | 11.68 | C <sub>12</sub> H <sub>14</sub> O <sub>9</sub>  | 301.0565[M-H] <sup>-</sup> | 283.0456[M-H-H <sub>2</sub> O] <sup>-</sup> , 125.0241[M-H-Glc UA] <sup>-</sup> ,<br>107.0144[M-H-Glc UA-H <sub>2</sub> O] <sup>-</sup>                                                                                                                                                                                                                                                                                                                                                   | 0.00  | 2,6-Dihydroxyphenyl-β-D-glucopyranosiduronic acid | + | + | - | + | - | + | + | [40]    |
| 26  | 12.24 | C <sub>9</sub> H <sub>8</sub> O <sub>3</sub>    | 163.0401[M-H] <sup>-</sup> | 119.0482[M-H-CO <sub>2</sub> ] <sup>-</sup> , 93.0316[M-H-CO <sub>2</sub> -C <sub>2</sub> H <sub>2</sub> ] <sup>-</sup><br>451.0989[M-H-H <sub>2</sub> O-C <sub>6</sub> H <sub>5</sub> O <sub>2</sub> ] <sup>-</sup> ,                                                                                                                                                                                                                                                                    | 0.18  | p-Coumaric acid                                   | + | + | + | + | + | + | + | [23]    |
| 27  | 12.57 | C <sub>30</sub> H <sub>26</sub> O <sub>12</sub> | 577.1354[M-H] <sup>-</sup> | 425.0835[M-H-C <sub>8</sub> H <sub>8</sub> O <sub>3</sub> ] <sup>-</sup> ,<br>407.0733[M-H-C <sub>8</sub> H <sub>8</sub> O <sub>3</sub> -H <sub>2</sub> O] <sup>-</sup> ,                                                                                                                                                                                                                                                                                                                 | 0.40  | Procyanidin B2                                    | + | + | + | + | + | + | + | [41–43] |
| 28  | 12.85 | C <sub>28</sub> H <sub>36</sub> O <sub>15</sub> | 611.1235[M-H] <sup>-</sup> | 300.9969[M-H-Neo] <sup>-</sup> , 275.0183                                                                                                                                                                                                                                                                                                                                                                                                                                                 | 0.982 | Neohesperidin dihydrochalcone                     | - | + | + | - | + | + | + | [29]    |
| 29  | 13.22 | C <sub>30</sub> H <sub>26</sub> O <sub>12</sub> | 577.1354[M-H] <sup>-</sup> | 451.0986[M-H-H <sub>2</sub> O-C <sub>6</sub> H <sub>5</sub> O <sub>2</sub> ] <sup>-</sup> ,<br>425.0829[M-H-C <sub>8</sub> H <sub>8</sub> O <sub>3</sub> ] <sup>-</sup> ,<br>407.0745[M-H-C <sub>8</sub> H <sub>8</sub> O <sub>3</sub> -H <sub>2</sub> O] <sup>-</sup> ,<br>289.0698[M-H-TOP] <sup>-</sup> , 245.0743[M-H-TOP-CO <sub>2</sub> ] <sup>-</sup> ,<br>179.0721[M-H-TOP-C <sub>6</sub> H <sub>5</sub> O <sub>2</sub> ] <sup>-</sup> , 125.0228[ <sup>1,4</sup> A] <sup>-</sup> | 0.30  | Procyanidin B1                                    | + | + | + | + | + | + | + | [41–43] |
| 30  | 13.54 | C <sub>45</sub> H <sub>38</sub> O <sub>18</sub> | 865.1952[M-H] <sup>-</sup> | 739.1671[M-H-C <sub>6</sub> H <sub>5</sub> O <sub>2</sub> -H <sub>2</sub> O] <sup>-</sup> , 713.1887[M-C <sub>8</sub> H <sub>8</sub> O <sub>3</sub> ] <sup>-</sup> ,<br>577.1301[M-H-TOP] <sup>-</sup> ,<br>407.0782[M-H-TOP-C <sub>8</sub> H <sub>8</sub> O <sub>3</sub> -H <sub>2</sub> O] <sup>-</sup> ,<br>289.0712[M-H-2TOP] <sup>-</sup> , 245.0800[M-H-2TOP-CO <sub>2</sub> ] <sup>-</sup> ,<br>125.0236[ <sup>1,4</sup> A] <sup>-</sup>                                           | 3.80  | Procyanidin C1                                    | + | + | + | + | + | + | + | [41–43] |
| 31  | 13.73 | C <sub>21</sub> H <sub>32</sub> O <sub>10</sub> | 443.1904[M-H] <sup>-</sup> | 425.1931[M-H-H <sub>2</sub> O] <sup>-</sup> , 281.1394[M-H-Glc] <sup>-</sup> ,                                                                                                                                                                                                                                                                                                                                                                                                            | 1.13  | Cynaroside A                                      | + | + | + | + | - | + | - | [44]    |
| 32* | 13.96 | C <sub>16</sub> H <sub>14</sub> O <sub>5</sub>  | 285.0620[M-H] <sup>-</sup> | 151.0184[ <sup>1,3</sup> A] <sup>-</sup> , 107.0291[ <sup>1,3</sup> A-CO <sub>2</sub> ] <sup>-</sup>                                                                                                                                                                                                                                                                                                                                                                                      | 3.16  | Isosakuranetin                                    | + | - | - | - | - | - | - | [45]    |
| 33  | 14.15 | C <sub>15</sub> H <sub>20</sub> O <sub>10</sub> | 359.0967[M-H] <sup>-</sup> | 197.0515[M-H-Glc] <sup>-</sup> , 153.0028[M-H-Glc-CO <sub>2</sub> ] <sup>-</sup> ,                                                                                                                                                                                                                                                                                                                                                                                                        | 1.90  | Glucosyringic acid                                | + | + | + | + | + | + | + | [46]    |
| 34  | 14.32 | C <sub>7</sub> H <sub>6</sub> O <sub>3</sub>    | 137.0224[M-H] <sup>-</sup> | 93.0334[M-H-CO <sub>2</sub> ] <sup>-</sup>                                                                                                                                                                                                                                                                                                                                                                                                                                                | 0.30  | 4-Hydroxybenzoic acid                             | + | + | + | + | + | + | + | [47]    |
| 35  | 14.34 | C <sub>13</sub> H <sub>16</sub> O <sub>8</sub>  | 299.0776[M-H] <sup>-</sup> | 137.0241[M-H-Glc] <sup>-</sup> , 93.0351[M-H-Glc-CO <sub>2</sub> ] <sup>-</sup>                                                                                                                                                                                                                                                                                                                                                                                                           | 1.2   | 4-Hydroxybenzoic acid<br>β-D-glucose ester        | + | + | + | + | + | + | + | [48]    |
| 36* | 14.74 | C <sub>15</sub> H <sub>14</sub> O <sub>6</sub>  | 289.0724[M-H] <sup>-</sup> | 245.0235[M-H-CO <sub>2</sub> ] <sup>-</sup> , 179.0341[M-H-B ring] <sup>-</sup> ,<br>167.0339[ <sup>1,2</sup> A] <sup>-</sup> , 163.0385[M-H-H <sub>2</sub> O-B ring] <sup>-</sup> ,<br>149.0234[ <sup>1,3</sup> B] <sup>-</sup> , 137.0237[ <sup>1,3</sup> A] <sup>-</sup> , 125.0235[ <sup>1,4</sup> A] <sup>-</sup> ,<br>109.0289[B ring] <sup>-</sup>                                                                                                                                 | 0.82  | (+)-catechin                                      | + | + | + | + | + | + | + | [34,36] |
| 37  | 14.75 | C <sub>15</sub> H <sub>14</sub> O <sub>6</sub>  | 289.0722[M-H] <sup>-</sup> | 245.0300[M-H-CO <sub>2</sub> ] <sup>-</sup> , 179.0339[M-H-B ring] <sup>-</sup> ,<br>167.0340[ <sup>1,2</sup> A] <sup>-</sup> , 163.0379[M-H-H <sub>2</sub> O-B ring] <sup>-</sup> ,<br>149.0246[ <sup>1,3</sup> B] <sup>-</sup> , 137.0237[ <sup>1,3</sup> A] <sup>-</sup> , 125.0229[ <sup>1,4</sup> A] <sup>-</sup> ,<br>109.0199[B ring] <sup>-</sup>                                                                                                                                 | 0.56  | Epicatechin                                       | + | + | + | + | + | + | + | [36]    |
| 38  | 14.76 | C <sub>9</sub> H <sub>8</sub> O <sub>4</sub>    | 179.0389[M-H] <sup>-</sup> | 135.0472[M-H-CO <sub>2</sub> ] <sup>-</sup> , 109.0440[M-H-CO <sub>2</sub> -CO] <sup>-</sup> ,                                                                                                                                                                                                                                                                                                                                                                                            | 3.46  | Caffeic acid                                      | + | - | + | + | + | + | + | [49]    |

|     |       |                                                 |                            |                                                                                                                                                                                                              |       |                                                       |               |         |
|-----|-------|-------------------------------------------------|----------------------------|--------------------------------------------------------------------------------------------------------------------------------------------------------------------------------------------------------------|-------|-------------------------------------------------------|---------------|---------|
| 39  | 14.91 | C <sub>15</sub> H <sub>20</sub> O <sub>9</sub>  | 343.1029[M-H] <sup>-</sup> | 181.0490[M-H-Glc] <sup>-</sup> , 135.0427[M-H-Glc-CH <sub>4</sub> O <sub>2</sub> ] <sup>-</sup> ,<br>121.0286[M-H-Glc-COOCH] <sup>-</sup>                                                                    | 2.04  | Methyl4-(β-D-glucopyranosyloxy)-<br>3-methoxybenzoate | + - + - + + - | [48]    |
| 40* | 15.27 | C <sub>16</sub> H <sub>18</sub> O <sub>9</sub>  | 353.0875[M-H] <sup>-</sup> | 191.0554[M-H-caffeoyl] <sup>-</sup> , 179.0365[M-H-C <sub>7</sub> H <sub>10</sub> O <sub>5</sub> ] <sup>-</sup>                                                                                              | 0.90  | Chlorogenic acid                                      | + + + + - - + | [23]    |
| 41  | 15.43 | C <sub>15</sub> H <sub>14</sub> O <sub>7</sub>  | 305.0667[M-H] <sup>-</sup> | 179.03325[M-H-B ring] <sup>-</sup> , 125.0245[ <sup>1,4</sup> A] <sup>-</sup>                                                                                                                                | 0.10  | Epigallocatechin                                      | + + + + + - + | [48]    |
| 42  | 16.13 | C <sub>12</sub> H <sub>22</sub> O <sub>8</sub>  | 293.1245[M-H] <sup>-</sup> | 131.0710[M-H-Glc] <sup>-</sup>                                                                                                                                                                               | 0.70  | Ethyl3-(β-D-glucopyranosyloxy)<br>butanoate           | + + + + + + + | [26]    |
| 43  | 16.23 | C <sub>15</sub> H <sub>12</sub> O <sub>7</sub>  | 303.0540[M-H] <sup>-</sup> | 151.0051[ <sup>1,3</sup> A] <sup>-</sup> , 152.0502[ <sup>1,3</sup> B] <sup>-</sup> ,                                                                                                                        | 2.50  | Taxifolin                                             | + + + + + + + | [50,51] |
| 44  | 16.28 | C <sub>21</sub> H <sub>20</sub> O <sub>10</sub> | 431.1181[M-H] <sup>-</sup> | 269.0453[M-H-Glc] <sup>-</sup> , 225.0671[M-H-Glc-CO] <sup>-</sup> ,<br>151.0033[ <sup>1,3</sup> A] <sup>-</sup> , 107.01[ <sup>1,3</sup> A-CO <sub>2</sub> ] <sup>-</sup>                                   | 1.47  | Cosmosiin                                             | + - + - - - - | [52]    |
| 45  | 17.59 | C <sub>17</sub> H <sub>32</sub> O <sub>10</sub> | 395.1919[M-H] <sup>-</sup> | 263.0437[M-H-Xyl] <sup>-</sup> , 101.0242[M-H-Xyl-Glc] <sup>-</sup>                                                                                                                                          | 0.71  | Hexyl 6-O-β-D-Xylopyranosyl-<br>β-D-glucopyranoside   | + + + + + + + | [53]    |
| 46  | 17.89 | C <sub>16</sub> H <sub>22</sub> O <sub>10</sub> | 373.1128[M-H] <sup>-</sup> | 193.0511[M-H-Glc] <sup>-</sup> , 149.0617[M-H-Glc-CO <sub>2</sub> ] <sup>-</sup> ,                                                                                                                           | 0.27  | Swertiamarin                                          | + + + + + + + | [40]    |
| 47  | 18.16 | C <sub>37</sub> H <sub>30</sub> O <sub>16</sub> | 729.1441[M-H] <sup>-</sup> | 577.1324[M-H-G <sup>1</sup> ] <sup>-</sup> , 441.0743[M-H-TOP] <sup>-</sup>                                                                                                                                  | 1.91  | Procyanidin B2 3'-O-gallate                           | + + + + + + + | [41–43] |
| 48  | 18.71 | C <sub>15</sub> H <sub>20</sub> O <sub>8</sub>  | 327.1085[M-H] <sup>-</sup> | 165.0551[M-H-Glc] <sup>-</sup> , 147.0446[M-H-Glc-H <sub>2</sub> O] <sup>-</sup> ,                                                                                                                           | 0.92  | Dihydromelilotoside                                   | + + + + + + + | [54]    |
| 49  | 18.97 | C <sub>15</sub> H <sub>20</sub> O <sub>8</sub>  | 327.1088[M-H] <sup>-</sup> | 165.0554[M-H-Glc] <sup>-</sup> , 147.0447[M-H-Glc-H <sub>2</sub> O] <sup>-</sup>                                                                                                                             | 0.9   | Androsin                                              | + + + + + + + | [55]    |
| 50  | 20.57 | C <sub>14</sub> H <sub>18</sub> O <sub>9</sub>  | 329.0877[M-H] <sup>-</sup> | 167.0338[M-H-Glc] <sup>-</sup> , 123.0444[M-H-Glc-CO <sub>2</sub> ] <sup>-</sup>                                                                                                                             | 2.33  | Phloracetophenone 4'-O- glucoside                     | + + + - + + + | [28]    |
| 51  | 20.96 | C <sub>27</sub> H <sub>30</sub> O <sub>14</sub> | 577.1329[M-H] <sup>-</sup> | 431.0985[M-H-Rha] <sup>-</sup> , 285.0244[M-H-2Rha] <sup>-</sup> ,                                                                                                                                           | 4.33  | Kaempferitrin                                         | + + - - + - - | [56]    |
| 52  | 23.64 | C <sub>15</sub> H <sub>10</sub> O <sub>7</sub>  | 301.1189[M-H] <sup>-</sup> | 283.1076[M-H-H <sub>2</sub> O] <sup>-</sup> , 271.1089[M-H-CO <sub>2</sub> ] <sup>-</sup> ,                                                                                                                  | 0.00  | Tricetin                                              | + + + + + + + | [28]    |
| 53  | 24.42 | C <sub>22</sub> H <sub>22</sub> O <sub>12</sub> | 477.1014[M-H] <sup>-</sup> | 315.0562[M-H-Glc] <sup>-</sup> , 300.0131[M-H-Glc-CH <sub>3</sub> ] <sup>-</sup> ,                                                                                                                           | 1.78  | Brassicin                                             | + + + + + - + | [55]    |
| 54  | 24.81 | C <sub>5</sub> H <sub>10</sub> O <sub>5</sub>   | 269.0647[M-H] <sup>-</sup> | 241.0466[M-H-CO] <sup>-</sup> , 226.0396[M-H-C <sub>2</sub> H <sub>2</sub> O] <sup>-</sup> ,                                                                                                                 | 0.706 | Galangin                                              | + + + + + + + | [57]    |
| 55  | 24.84 | C <sub>5</sub> H <sub>10</sub> O <sub>5</sub>   | 269.0650[M-H] <sup>-</sup> | 241.0507[M-H-CO] <sup>-</sup> , 225.0538[M-H-CO <sub>2</sub> ] <sup>-</sup> ,<br>197.0582[M-H-CO <sub>2</sub> -CO] <sup>-</sup> ,<br>182.0574[M-H-CO-CO <sub>2</sub> -CH <sub>3</sub> ] <sup>-</sup>         | 1.67  | Emodin                                                | + + + + + + + | [58]    |
| 56  | 27.32 | C <sub>22</sub> H <sub>18</sub> O <sub>10</sub> | 441.0817[M-H] <sup>-</sup> | 289.0713[M-H-G] <sup>-</sup> , 271.0630[M-H-G-H <sub>2</sub> O] <sup>-</sup> ,<br>179.0362[M-H-G-B ring] <sup>-</sup> , 135.0242[ <sup>1,3</sup> A] <sup>-</sup> ,<br>125.0247,109.0292[B ring] <sup>-</sup> | 2.30  | (-)-Epicatechin gallate                               | + + + + + - + | [59]    |
| 57  | 27.57 | C <sub>22</sub> H <sub>24</sub> O <sub>12</sub> | 479.1198[M-H] <sup>-</sup> | 315.0564[M-H-Glc] <sup>-</sup> , 211.0523[ <sup>0,4</sup> B] <sup>-</sup> , 165.0558[ <sup>1,3</sup> B] <sup>-</sup> ,<br>151.0542[ <sup>1,3</sup> A] <sup>-</sup> ,<br>127.0244[B ring] <sup>-</sup>        | 0.60  | 3 '-O-methyldihydroquercetin<br>-7-O-β-D-glucoside    | + + + + + + + | [60]    |

|     |       |                                                 |                            |                                                                                                                                                                                                                                                                                                                                                                                                    |       |                                                                                             |   |   |   |   |   |   |   |      |
|-----|-------|-------------------------------------------------|----------------------------|----------------------------------------------------------------------------------------------------------------------------------------------------------------------------------------------------------------------------------------------------------------------------------------------------------------------------------------------------------------------------------------------------|-------|---------------------------------------------------------------------------------------------|---|---|---|---|---|---|---|------|
| 58* | 28.18 | C <sub>28</sub> H <sub>24</sub> O <sub>16</sub> | 615.0991[M-H] <sup>-</sup> | 463.0868[M-H-G] <sup>-</sup> , 301.3056[M-H-G-Glc/Gal] <sup>-</sup>                                                                                                                                                                                                                                                                                                                                | 0.09  | Quercetin-3-O-(6"-galloyl)-β-galactopyranoside/Quercetin-3-O-(6"-galloyl)-β-glucopyranoside | + | + | - | + | - | - | - | [61] |
| 59  | 29.73 | C <sub>21</sub> H <sub>20</sub> O <sub>12</sub> | 463.0866[M-H] <sup>-</sup> | 301.0347[M-H-Rha] <sup>-</sup> , 151.0022 <sup>[1,2]</sup> A-CO] <sup>-</sup> , 107.0149 <sup>[1,2]</sup> A-CO-CO <sub>2</sub> <sup>-</sup>                                                                                                                                                                                                                                                        | 3.40  | Myricitrin                                                                                  | + | + | + | + | + | = | - | [62] |
| 60  | 29.94 | C <sub>18</sub> H <sub>24</sub> O <sub>10</sub> | 399.1298[M-H] <sup>-</sup> | 329.0508[M-H-C <sub>5</sub> H <sub>10</sub> ] <sup>-</sup> , 169.0150[M-H-C <sub>5</sub> H <sub>10</sub> -Glc] <sup>-</sup> , 151.0072[M-H-C <sub>5</sub> H <sub>10</sub> -Glc-H <sub>2</sub> O] <sup>-</sup> , 125.0236[M-H-C <sub>5</sub> H <sub>10</sub> -Glc-CO <sub>2</sub> ] <sup>-</sup> , 107.0142[M-H-C <sub>5</sub> H <sub>10</sub> -Glc-CO <sub>2</sub> -H <sub>2</sub> O] <sup>-</sup> | 0.50  | Taxilluside A                                                                               | + | + | + | + | + | - | + | [12] |
| 61* | 31.17 | C <sub>27</sub> H <sub>30</sub> O <sub>16</sub> | 609.1453[M-H] <sup>-</sup> | 301.0354[M-H-RG] <sup>-</sup> , 151.0028[M-H-RG- <sup>1,3</sup> B] <sup>-</sup>                                                                                                                                                                                                                                                                                                                    | 1.32  | Rutin                                                                                       | + | + | + | + | + | + | + | [63] |
| 62* | 31.30 | C <sub>21</sub> H <sub>20</sub> O <sub>12</sub> | 463.0864[M-H] <sup>-</sup> | 301.0341[M-H-Gal] <sup>-</sup> , 271.0233[M-H-Gal-CHO] <sup>-</sup> , 151.0025 <sup>[1,3]</sup> A] <sup>-</sup>                                                                                                                                                                                                                                                                                    | 3.40  | Hyperoside                                                                                  | + | + | + | + | - | + | - | [62] |
| 63  | 31.95 | C <sub>21</sub> H <sub>22</sub> O <sub>11</sub> | 449.1077[M-H] <sup>-</sup> | 431.0945[M-H-H <sub>2</sub> O] <sup>-</sup> , 303.0478[M-H-Rha] <sup>-</sup> , 285.0380[M-H-Rha-H <sub>2</sub> O] <sup>-</sup> , 178.9977[M-H-Rha-H <sub>2</sub> O-B ring] <sup>-</sup> , 151.0030, 125.0240                                                                                                                                                                                       | 0.223 | Astilbin                                                                                    | - | + | - | - | - | - | + | [68] |
| 64* | 32.06 | C <sub>21</sub> H <sub>18</sub> O <sub>13</sub> | 477.0655[M-H] <sup>-</sup> | 301.6332[M-H-Glc UA] <sup>-</sup> , 283.0230[M-H-Glc UA-H <sub>2</sub> O] <sup>-</sup> , 151.0027 <sup>[1,3]</sup> A] <sup>-</sup> , 107.0140 <sup>[0,4]</sup> A] <sup>-</sup>                                                                                                                                                                                                                     | 4.12  | Quercetin 3-O-β-D-glucuronide                                                               | + | + | + | + | + | + | + | [61] |
| 65  | 32.39 | C <sub>29</sub> H <sub>36</sub> O <sub>15</sub> | 623.1976[M-H] <sup>-</sup> | 461.1651[M-H-C <sub>9</sub> H <sub>6</sub> O <sub>3</sub> ] <sup>-</sup> , 315.1087[M-H-C <sub>9</sub> H <sub>6</sub> O <sub>3</sub> -C <sub>6</sub> H <sub>10</sub> O <sub>4</sub> ] <sup>-</sup> , 179.0340, 161.0232, 135.0444                                                                                                                                                                  | 0.160 | Acteoside                                                                                   | - | + | + | + | + | + | + | [69] |
| 66* | 32.46 | C <sub>21</sub> H <sub>20</sub> O <sub>12</sub> | 463.0872[M-H] <sup>-</sup> | 301.0346[M-H-Glc] <sup>-</sup> , 151.0034 <sup>[1,3]</sup> A] <sup>-</sup>                                                                                                                                                                                                                                                                                                                         | 2.2   | Isoquercitrin                                                                               | + | + | + | + | + | + | - | [64] |
| 67* | 34.39 | C <sub>20</sub> H <sub>18</sub> O <sub>11</sub> | 433.0772[M-H] <sup>-</sup> | 301.0354[M-H-Ara] <sup>-</sup> , 151.0037 <sup>[1,3]</sup> A] <sup>-</sup> , 107.0139 <sup>[0,4]</sup> A] <sup>-</sup>                                                                                                                                                                                                                                                                             | 0.12  | Avicularin                                                                                  | + | + | + | + | + | + | + | [65] |
| 68  | 34.42 | C <sub>21</sub> H <sub>22</sub> O <sub>12</sub> | 465.1035[M-H] <sup>-</sup> | 313.0140 <sup>[1,3]</sup> B] <sup>-</sup> , 303.0570[M-H-Glc] <sup>-</sup> , 151.0391 <sup>[1,3]</sup> A] <sup>-</sup> , 123.0085 <sup>[1,4]</sup> A] <sup>-</sup>                                                                                                                                                                                                                                 | 0.774 | Taxifolin 3'-O-β-D-glucopyranoside                                                          | + | + | + | + | + | + | + | [54] |
| 69  | 34.48 | C <sub>28</sub> H <sub>32</sub> O <sub>16</sub> | 623.1975[M-H] <sup>-</sup> | 461.1654[M-H-Rha] <sup>-</sup> , 315.1075[M-H-Rha-Glc] <sup>-</sup>                                                                                                                                                                                                                                                                                                                                | 0.321 | Narcissin                                                                                   | - | - | - | + | + | + | + | [70] |
| 70  | 34.99 | C <sub>27</sub> H <sub>30</sub> O <sub>15</sub> | 593.1501[M-H] <sup>-</sup> | 285.0405[M-H-RG] <sup>-</sup>                                                                                                                                                                                                                                                                                                                                                                      | 1.80  | Kaempferol 3-rutinoside                                                                     | + | + | + | + | + | + | + | [58] |
| 71  | 35.11 | C <sub>21</sub> H <sub>20</sub> O <sub>11</sub> | 447.0935[M-H] <sup>-</sup> | 285.0393[M-H-Glc] <sup>-</sup> , 243.0497[M-H-Glc-C <sub>2</sub> H <sub>2</sub> O] <sup>-</sup> , 241.0341[M-H-Glc-CO <sub>2</sub> ] <sup>-</sup> , 151.0029 <sup>[1,3]</sup> A] <sup>-</sup>                                                                                                                                                                                                      | 0.50  | Luteolin-7-O-glucoside                                                                      | + | + | + | + | + | + | + | [13] |
| 72  | 35.19 | C <sub>21</sub> H <sub>22</sub> O <sub>11</sub> | 449.1073[M-H] <sup>-</sup> | 431.0945[M-H-H <sub>2</sub> O] <sup>-</sup> , 303.0478[M-H-Rha] <sup>-</sup> , 285.0380[M-H-Rha-H <sub>2</sub> O] <sup>-</sup> , 178.9977[M-H-Rha-H <sub>2</sub> O-B ring] <sup>-</sup> , 151.0030, 125.0240                                                                                                                                                                                       | 0.891 | Isoastilbin                                                                                 | - | - | - | - | - | - | + | [68] |

|     |       |                                                 |                            |                                                                                                                                                                                                                                      |       |                               |   |   |   |   |   |   |   |         |
|-----|-------|-------------------------------------------------|----------------------------|--------------------------------------------------------------------------------------------------------------------------------------------------------------------------------------------------------------------------------------|-------|-------------------------------|---|---|---|---|---|---|---|---------|
| 73* | 35.38 | C <sub>21</sub> H <sub>20</sub> O <sub>11</sub> | 447.0921[M-H] <sup>-</sup> | 301.0354[M-H-Rha] <sup>-</sup> , 283.0223[M-H-Rha-H <sub>2</sub> O] <sup>-</sup> , 151.0024[ <sup>1,3</sup> A] <sup>-</sup>                                                                                                          | 2.7   | Quercitrin                    | + | + | + | + | + | + | + | [55]    |
| 74  | 35.54 | C <sub>21</sub> H <sub>22</sub> O <sub>10</sub> | 433.1131[M-H] <sup>-</sup> | 269.0442[M-H-Glc] <sup>-</sup> , 178.9977[M-H-Glc-B ring] <sup>-</sup> , 151.0028[ <sup>1,3</sup> A] <sup>-</sup>                                                                                                                    | 0.231 | Isohemiphloin                 | - | + | - | + | + | + | + | [71]    |
| 75  | 36.48 | C <sub>22</sub> H <sub>18</sub> O <sub>9</sub>  | 425.0874[M-H] <sup>-</sup> | 273.0478[M-H-C <sub>7</sub> H <sub>4</sub> O <sub>4</sub> ] <sup>-</sup> , 151.0390[ <sup>1,3</sup> A] <sup>-</sup> , 137.0234, 125.0237[ <sup>1,4</sup> A] <sup>-</sup>                                                             | 0.00  | (-)-Epiafzelechin 3-O-gallate | - | + | + | + | + | + | + | [72]    |
| 76  | 36.54 | C <sub>23</sub> H <sub>24</sub> O <sub>10</sub> | 459.1288[M-H] <sup>-</sup> | 297.0762[M-H-Glc] <sup>-</sup> , 191.0342[M-H-Glc-B ring] <sup>-</sup>                                                                                                                                                               | 1.74  | 8-methylretusin-7β-glucoside  | + | + | + | + | + | + | - | [51]    |
| 77  | 36.71 | C <sub>21</sub> H <sub>20</sub> O <sub>11</sub> | 447.0925[M-H] <sup>-</sup> | 285.0389[M-H-Glc] <sup>-</sup> , 151.0022[ <sup>1,3</sup> A] <sup>-</sup>                                                                                                                                                            | 1.50  | Astragalin                    | + | + | + | + | + | + | + | [65]    |
| 78  | 36.83 | C <sub>22</sub> H <sub>22</sub> O <sub>11</sub> | 461.0713[M-H] <sup>-</sup> | 312.9958[M-H-Rha] <sup>-</sup> , 285.0016[M-H-Rha-OCH <sub>3</sub> ] <sup>-</sup>                                                                                                                                                    | 0.651 | Rhamnitrin                    | - | + | + | + | + | + | + | [73]    |
| 79  | 37.07 | C <sub>20</sub> H <sub>20</sub> O <sub>8</sub>  | 387.1141[M-H] <sup>-</sup> | 341.1081[M-H-CH <sub>3</sub> -OCH <sub>3</sub> ] <sup>-</sup> , 218.8840[M-H-OCH <sub>3</sub> -2OCH <sub>3</sub> -B ring] <sup>-</sup> , 119.0350[M-H-C <sub>12</sub> H <sub>11</sub> O <sub>6</sub> -CH <sub>3</sub> ] <sup>-</sup> | 1.30  | 5-Demethylnobiletin           | + | - | - | - | - | - | - | [66]    |
| 80  | 37.09 | C <sub>21</sub> H <sub>22</sub> O <sub>10</sub> | 433.1131[M-H] <sup>-</sup> | 311.0641[ <sup>1,3</sup> A] <sup>-</sup> , 271.0641[M-H-Glc] <sup>-</sup> , 151.0031[ <sup>1,3</sup> A] <sup>-</sup> , 119.0511[ <sup>1,3</sup> B] <sup>-</sup> , 107.0135[B ring] <sup>-</sup>                                      | 0.02  | Prunin                        | + | + | - | + | + | + | + | [28,55] |
| 81  | 37.40 | C <sub>21</sub> H <sub>20</sub> O <sub>10</sub> | 431.0981[M-H] <sup>-</sup> | 285.0406[M-H-Rha] <sup>-</sup> , 227.0352[M-H-Rha-2CO] <sup>-</sup>                                                                                                                                                                  | 0.60  | Afzelin                       | + | - | + | - | - | - | - | [60,61] |
| 82  | 37.89 | C <sub>27</sub> H <sub>32</sub> O <sub>14</sub> | 579.2082[M-H] <sup>-</sup> | 371.1496[M-H-Glc-CH <sub>2</sub> OH] <sup>-</sup> , 256.1267[M-H-2Glc] <sup>-</sup> , 228.0413[M-H-2Glc-CO] <sup>-</sup>                                                                                                             | 1.33  | Cascaroside A                 | - | - | + | + | - | + | - | [74]    |
| 83  | 38.64 | C <sub>27</sub> H <sub>30</sub> O <sub>14</sub> | 577.0974[M-H] <sup>-</sup> | 415.0855[M-H-Rha] <sup>-</sup> , 269.0745[M-H-Rha-Glc] <sup>-</sup> , 225.0675[M-H-Rha-Glc-CO] <sup>-</sup>                                                                                                                          | 0.347 | Apigenin-7-O-rutinoside       | - | - | + | - | - | - | - | [75]    |
| 84  | 38.85 | C <sub>27</sub> H <sub>28</sub> O <sub>13</sub> | 559.158-[M-H] <sup>-</sup> | 397.0178[M-H-Rha] <sup>-</sup> , 280.4159[M-H-C <sub>12</sub> H <sub>18</sub> O <sub>8</sub> ] <sup>-</sup>                                                                                                                          | 0.10  | Apimaysin                     | - | + | + | - | - | + | + | [76]    |
| 85* | 39.51 | C <sub>15</sub> H <sub>10</sub> O <sub>7</sub>  | 301.0354[M-H] <sup>-</sup> | 273.0376[M-H-CO] <sup>-</sup> , 178.9988[ <sup>1,2</sup> A] <sup>-</sup> , 151.0030[ <sup>1,3</sup> A] <sup>-</sup> , 121.0296[ <sup>1,2</sup> B] <sup>-</sup> , 107.0143[ <sup>0,4</sup> A] <sup>-</sup>                            | 0.73  | Quercetin                     | + | + | + | + | + | + | + | [61]    |

Note: (1)\*:comparison with reference standards; (2) -, not detected; +, detected; (3) *Morus alba* L. (a), *Liquidambar formosana* Hance. (b), *Ilex latifolia* Thunb. (c), *Crataegus pinnatifida* Bge. var. *major* N.E.Br. (d), *Passiflora edulia* Sims. (e), *Pyrus pyrifolia* (Burm. F.) Nakai. (f), and *Cinnamomum camphora* (L.) Presl (g).
